# Supplementary material
Source: PubMed Central journal article supplement (PMC7802826)
Supplement: NIHMS1655729-supplement-Supplementary_material.pdf [file NIHMS1655729-supplement-Supplementary_material.pdf]

## Supplementary Materials

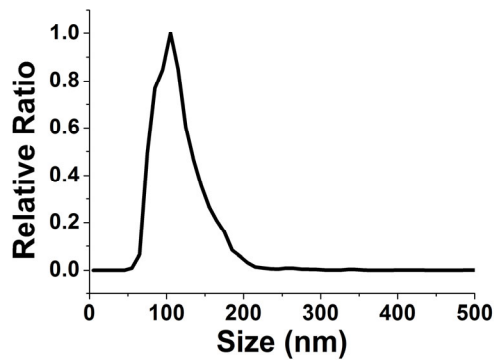

Figure S1. Measurement of the size distribution of nanospheres. Nanoparticle analysis was performed by using NanoSight NS500 (Malvern Instruments, UK). Nanoparticles were visualized by light scattering, and a snap shot of nanoparticle Brownian motion recorded for nanoparticle hydrodynamic size measurement. Nanoparticle size distribution was normalized by the highest concentration.

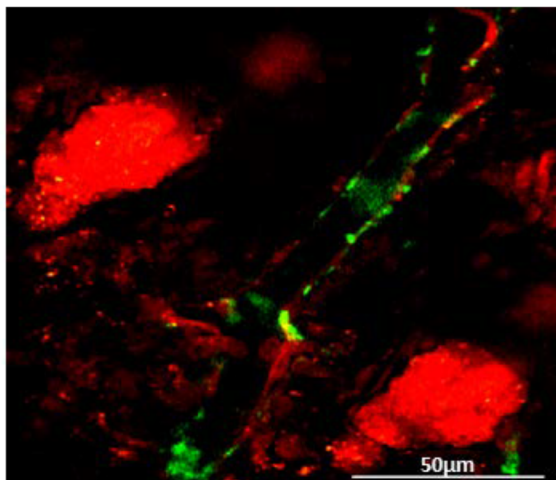

Figure S2. FCN bind to endothelium for up to 48 hours post-injection. Two-photon in vivo microscopy of a murine ear vessel 48 hours after injection of Alexa Fluor 488 labeled FCN showed persistent green signal lining the endothelium.
